# Supplementary material for: Ultrastable and high colour rendering index WLEDs based on CsPbBrI2 nanocrystals prepared by a two-step facile encapsulation method
Source: Royal Society of Chemistry journal article supplement (doi:10.1039/d0tc05587e), 2021-01-01
Supplement: d0tc05587e1.pdf [file d0tc05587e1.pdf]

## Supporting Information

### Ultrastable and high colour rendering index WLEDs based on two-step facile encapsulate CsPbBr<sub>2</sub> nanocrystals

Yao Tong<sup>a</sup>, Mengfeifei Jin<sup>a</sup>, Ya Chen<sup>b</sup>, Yi Zhao<sup>b</sup>, Haisheng Yang<sup>a</sup>, Qin Wang<sup>b</sup>,

Lanlan Zhai<sup>a,\*</sup>, Xiaojuan Liang<sup>a,\*</sup>, Weidong Xiang<sup>a,\*</sup>

<sup>a</sup>College of Chemistry and Materials Engineering, Wenzhou University, Wenzhou 325035, China

<sup>b</sup>College of Life and Environmental Science, Wenzhou University, Wenzhou 325035, China.

\*Corresponding authors: Weidong Xiang (E-mail: xiangweidong001@126.com)

Xiaojuan Liang (E-mail: lxj6126@126.com)

Lanlan Zhai (E-mail: zhaill@wzu.edu.cn)

**Table S1.** The FWHM and PLQY values of CsPbBr<sub>2</sub>@zeolite and PMMA samples.

| sample    | CsPbBr <sub>2</sub> @zeolite |        |        | CsPbBr <sub>2</sub> @zeolite/PMMA |        |        |         |         |
|-----------|------------------------------|--------|--------|-----------------------------------|--------|--------|---------|---------|
|           | 130 °C                       | 150 °C | 170 °C | PMMA-3                            | PMMA-6 | PMMA-9 | PMMA-12 | PMMA-15 |
| FWHM (nm) | 36.4                         | 40.5   | 37.8   | 38.4                              | 32.9   | 34.1   | 34      | 34.6    |
| PLQY      | 45                           | 54.2   | 52     | 28                                | 36     | 42     | 50.5    | 53.9    |

**Table S2.** The emission wavelength and FWHM data of the CsPbBr<sub>2</sub>@zeolite and PMMA-15 samples were compared after 30 days in air.

| Sample                       | Emission Wavelength (nm) |               | FWHM (nm) |               |
|------------------------------|--------------------------|---------------|-----------|---------------|
|                              | Former                   | After 30 days | Former    | After 30 days |
| CsPbBr <sub>2</sub> @zeolite | 647                      | 645           | 40.5      | 43.18         |
| PMMA-15                      | 641                      | 641           | 34.6      | 34.6          |

**Table S3.** Testing correlated color temperature (CCT), Theoretical CCT, Color rendering index (CRI), CIE Coordinates (x, y) based of R-PMMA-15 WLEDs under different forward current.

| Current | Testing CCT (K) | Theoretical CCT (K) | CRI  | CIE (x, y)       |
|---------|-----------------|---------------------|------|------------------|
| 10 mA   | 5354            | 5352                | 94.5 | (0.3359, 0.3455) |
| 20 mA   | 5856            | 5855                | 94.1 | (0.3324, 0.3434) |
| 40 mA   | 6473            | 6473                | 90.4 | (0.3115, 0.3425) |
| 60 mA   | 6967            | 6976                | 86.9 | (0.3022, 0.3399) |
| 80 mA   | 7418            | 7431                | 81.9 | (0.2950, 0.3356) |
| 100 mA  | 7623            | 7637                | 79.2 | (0.2922, 0.3329) |
| 120 mA  | 7677            | 7686                | 78.3 | (0.2912, 0.3336) |

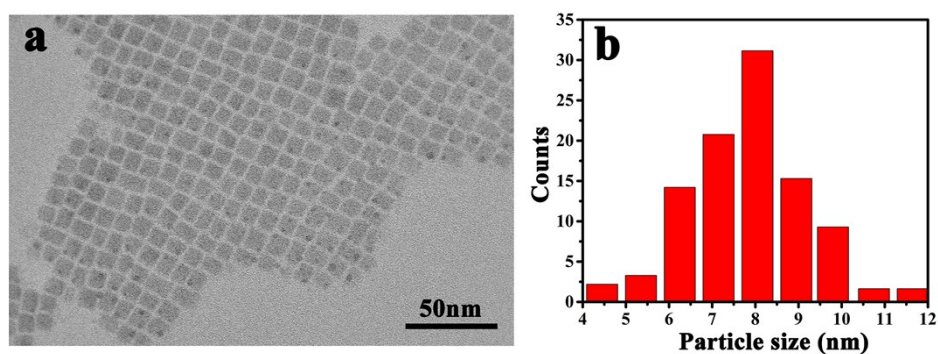

**Figure S1.** a) The TEM image of CsPbBr<sub>2</sub>-150 °C solution. b) The particle size distribution histograms of the CsPbBr<sub>2</sub>-150 °C solution.

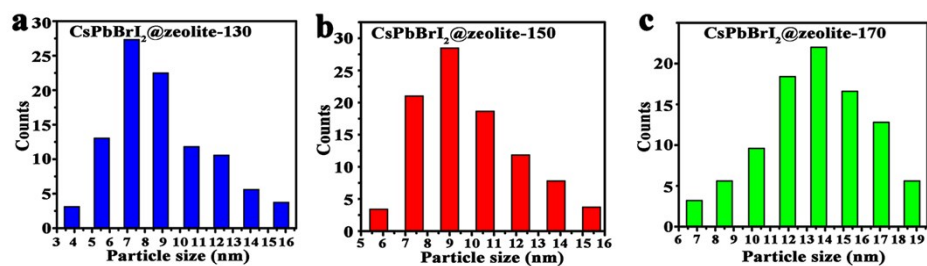

**Figure S2.** The corresponding particle size distribution histograms of the CsPbBr<sub>2</sub>@zeolite powder at different heat treatment temperatures e) 130 °C, f) 150 °C and g) 170 °C, respectively.

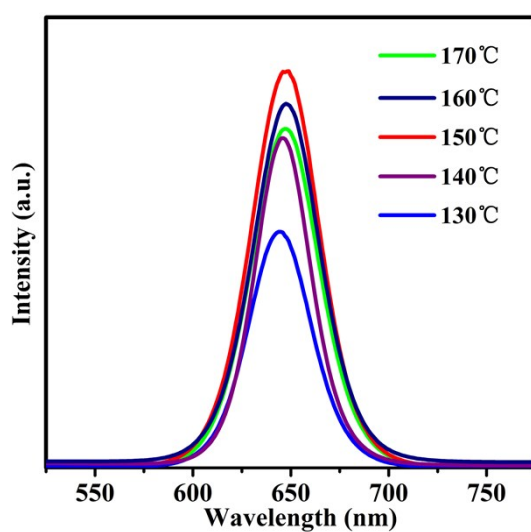

**Figure S3.** The emission spectra of the prepared CsPbBr<sub>2</sub>@zeolite under different reaction temperature.

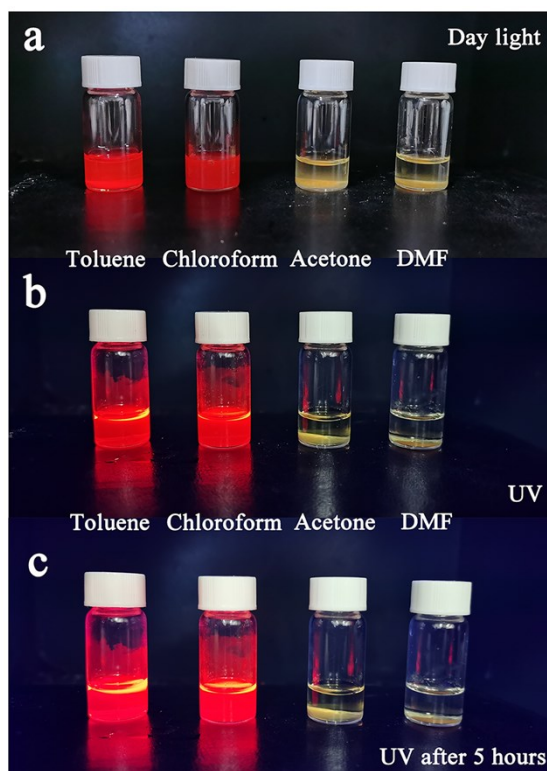

**Figure S4.** The photographs for solvent stability of CsPbBr<sub>2</sub>@zeolite + toluene, chloroform, acetone, DMF (dimethylformamide), left to right. a) Day light. b) UV light. c) UV light after 5 hours.

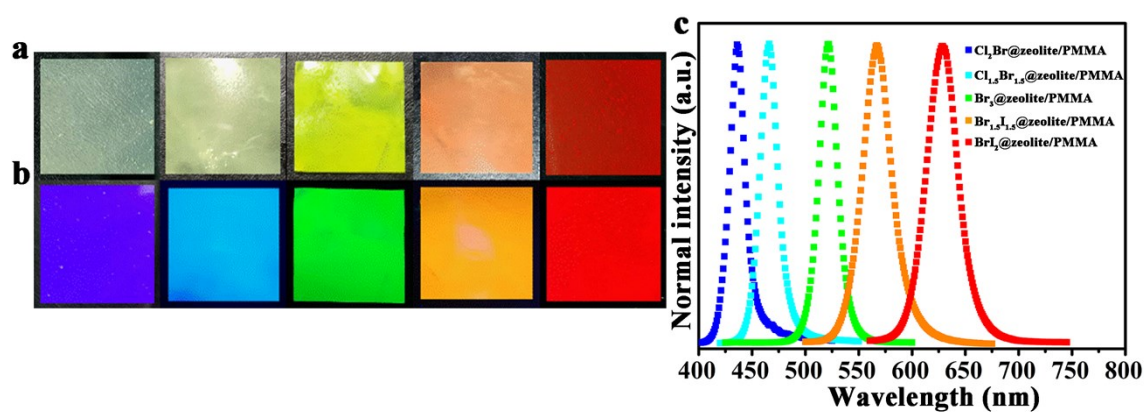

**Figure S5.** a, b) The photographs and c) normal PL spectra of Cl<sub>2</sub>Br@zeolite/PMMA, Cl<sub>1.5</sub>Br<sub>1.5</sub>@zeolite/PMMA, Br<sub>3</sub>@zeolite/PMMA, Br<sub>1.5</sub>I<sub>1.5</sub>@zeolite/PMMA, BrI<sub>2</sub>@zeolite/PMMA, from left to right. a) Day light. b) UV light.

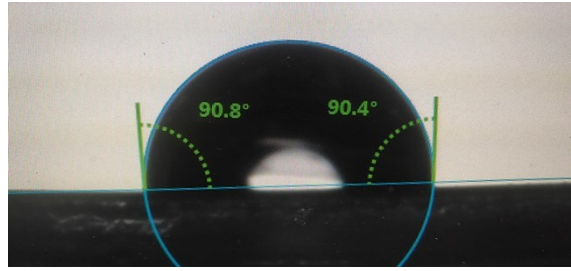

**Figure S6.** Water contact-angle measurement of CsPbBr<sub>2</sub>@zeolite/PMMA-15 film.

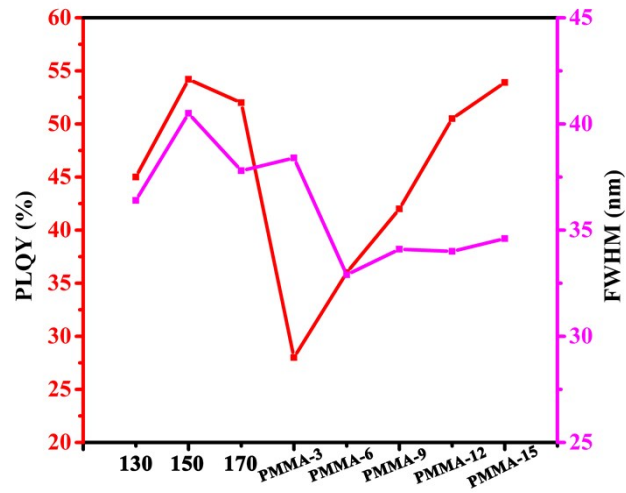

**Figure S7.** The changing curve of PLQY and FWHM value of CsPbBr<sub>2</sub>@zeolite with different reaction temperature and CsPbBr<sub>2</sub>@zeolite/PMMA.

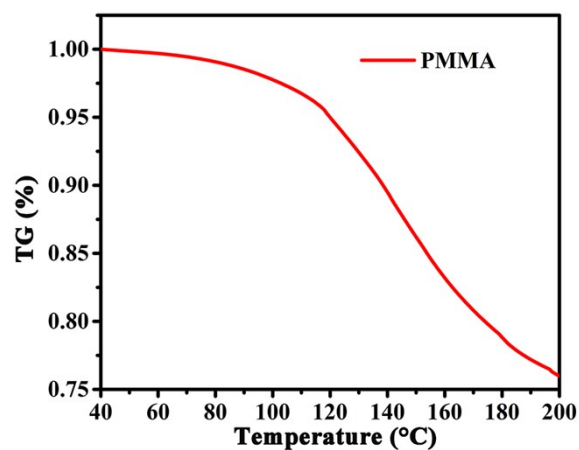

**Figure S8.** The TAG curve of PMMA polymer film.

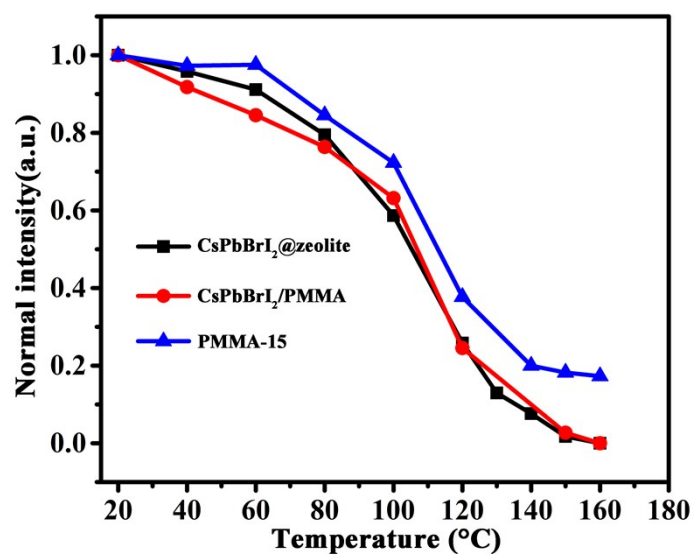

**Figure S9.** Temperature-dependent normal intensity of CsPbBr<sub>2</sub>@zeolite (black) , CsPbBr<sub>2</sub>/PMMA (red) and PMMA-15 (blue).

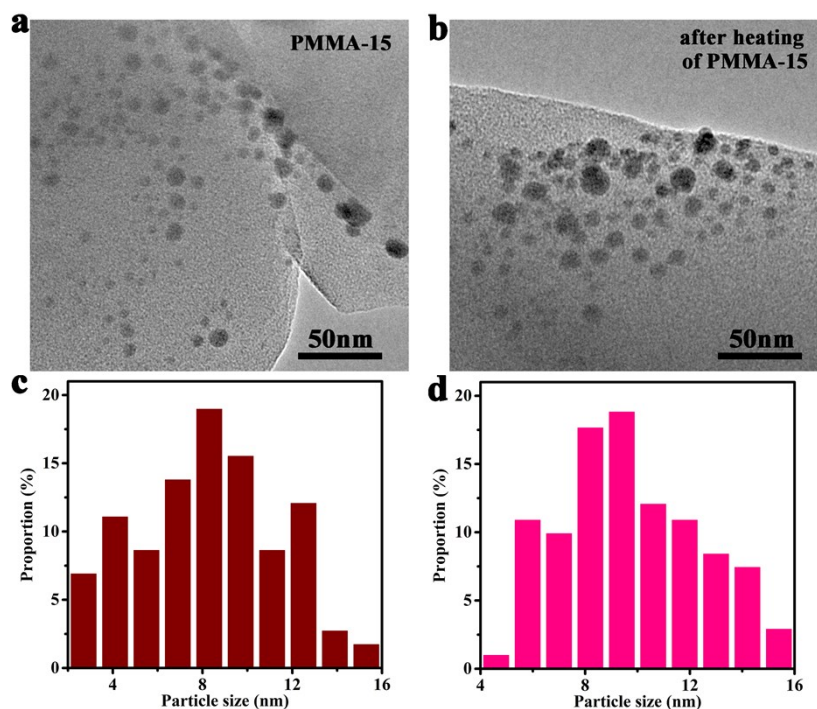

**Figure S10.** The TEM image of a) PMMA-15 and b) PMMA-15 after heating at 120°C. The particle size distribution histograms of c) PMMA-15 and d) PMMA-15 after heating at 120°C.

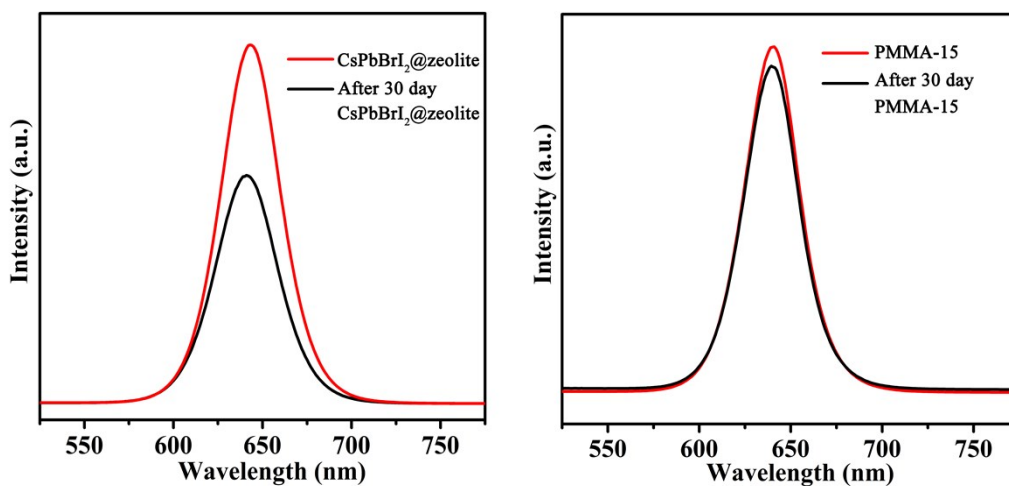

**Figure S11.** PL spectra of a) CsPbBr<sub>2</sub>@zeolite and b) PMMA-15 after two months in air.

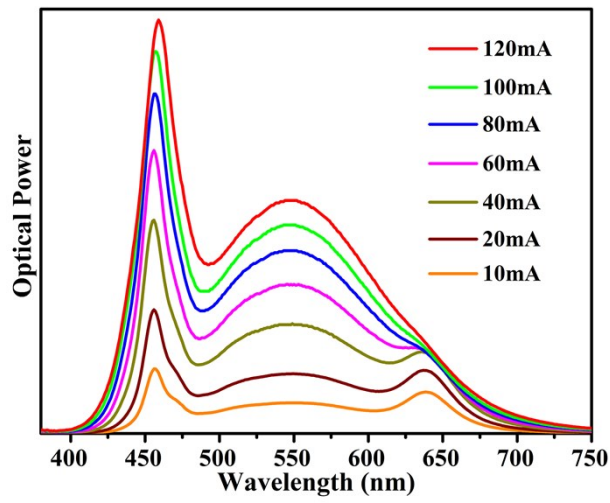

**Figure S12.** The corresponding spectral power distribution curves of different currents.
